# Supplementary material
Source: publisher figshare collection journal article supplement (https://gsapubs.figshare.com/ndownloader/files/25972916)
Supplement: Supplementary file 1 [file 25972916]

## Sheet: Sheet1
Data Repository Table 6: Paleomagnetic results from the High Wall Wash site
SAMPLE NAME	DEMAG	POLARITY	DECL.	INCL.	MAD	RANK
HWW 1	TH	N	344.1	52.2	5.4	B
HWW 2-1	TH	AMBIG	201.8	19.8	6.4	B
HWW 3-1	AF/LTD	N/A				D
HWW 3-2	TH	AMBIG	137.3	46.9	7.6	A
HWW 3-3	TH	N	355.2	66.3	6.7	B
HWW 5-1	AF/LTD	AMBIG	16.9	-33	10.4	C
HWW 5-2	TH	R	123.3	-45.7	10.2	A
HWW 6-1	AF/LTD	R	137.1	-29.5	9.9	B
HWW 6-6	TH	N	305.3	61.1	3.1	B
HWW 6-7	AF/LTD	R	198	-17.2	8.5	A
HWW 6-8	TH	N	322.5	66.7	5.6	A
HWW 6-9	TH	N/A				D
HWW 6-10	TH	N	282.8	68.3	7.9	C
HWW 7-1	AF/LTD	R	197	-52	4.7	C
HWW 8-1	AF/LTD	R	177.6	-28.8	8.6	A
HWW 8-2	TH	N	304.4	16.5	10.2	B
HWW 9-1	AF	N	345.9	71	9.3	B
HWW 9-2	AF/LTD	N	330.7	76	3.1	B
HWW 9-3	AF	N/A				D
HWW 9-6	AF	N	348	66.4	4.8	B
HWW 9-7	TH	N	10.3	65.6	2.7	B
HWW 9-8	AF	N	312.7	62	2.7	B
HWW 9-9	TH	N	1.7	67.4	10.7	B
HWW 9-10	TH	N	315.3	33.3	5.6	C
HWW 9-11	TH	N	21.6	43.1	8.4	C
HWW 10-1	AF	N	295.3	67.9	8.5	B
HWW 10-2	TH	N/A				D
HWW 11-1	AF	N	4.8	67.9	15	C
HWW 11-2	AF	N	356.6	53.3	2.4	A
HWW 11-3	AF/LTD	N	334	72.6	11.3	C
HWW 11-4	TH	N/A				D
HWW 11-7	TH	N	26.3	44.9	15	B
HWW 12-1A	AF	N	53.1	61	6.2	B
HWW 12-7	TH	N	6.3	56.7	5.2	B
HWW 12-8	AF	N	23.3	62.5	5.2	B
HWW 12-9	TH	N	20.1	64	3.4	A
Data table showing sample name, demagnetization technique (TH=thermal, AF=alternating field, LTD=low temperature demagnetization), polarity (N=normal, R=reverse), magnetization declination (DEC) and inclination (INC), mean angular deviation (MAD) of characteristic magnetization, and “quality” of characteristic magnetization, ranked from A=highest to D=lowest (see methods). All paleomagnetic sampl…

## Sheet: G48080
Crow, R.S., et al., 2021, Redefining the age of the lower Colorado River, southwestern United States: Geology, v. 49, https://doi.org/10.1130/G48080.1
